# Supplementary material
Source: PubMed Central journal article supplement (PMC9748827)

Supplemental Fig. 3

A

| Marker    | Fluorophore          | Stain   | Manufacturer | Catalog # |
|-----------|----------------------|---------|--------------|-----------|
| Live/Dead | BV605                | Surface | ThermoFisher | L34967    |
| CD45      | APC/Fire 750         | Surface | BioLegend    | 103153    |
| CD11b     | PE                   | Surface | BioLegend    | 101207    |
| Ly6G      | Brilliant Violet 421 | Surface | BioLegend    | 127627    |
| CD11c     | PE/Cyanine7          | Surface | BioLegend    | 117317    |
| F4/80     | APC                  | Surface | BioLegend    | 123115    |
| Ly6C      | Brilliant Violet 510 | Surface | BioLegend    | 128033    |
| GFP       | FITC                 | Surface | BioLegend    | 100203    |

B

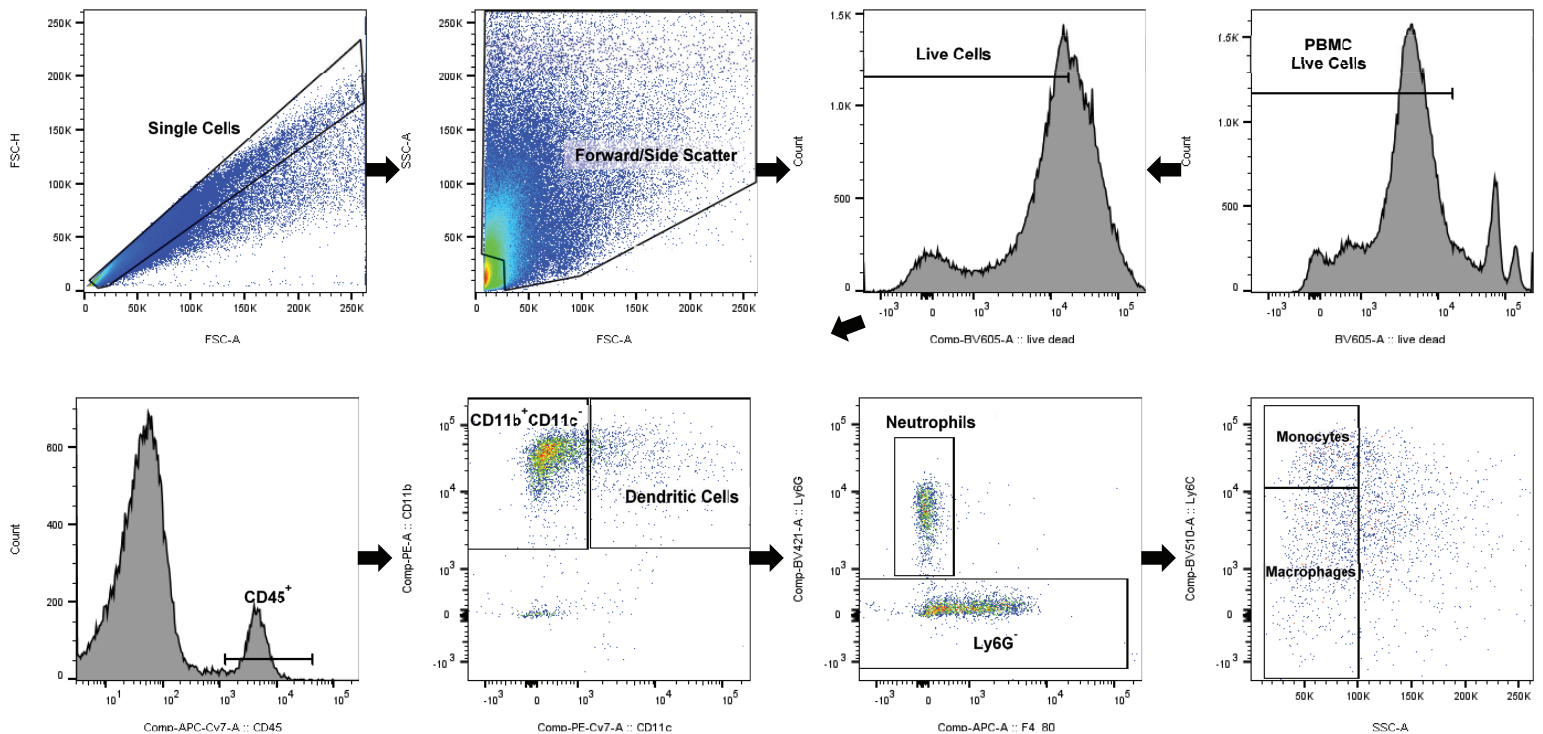

Supplement: NIHMS1853978-supplement-Supplemental_Figure_3.pdf [file NIHMS1853978-supplement-Supplemental_Figure_3.pdf]
