# Supplementary material
Source: PubMed Central journal article supplement (PMC9748827)

Supplemental Fig. 1

A

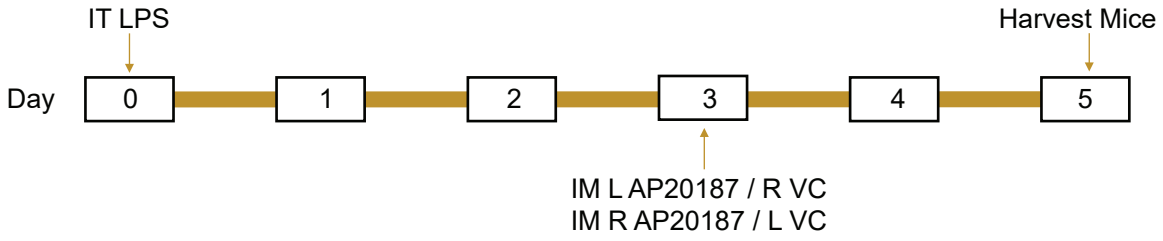

B

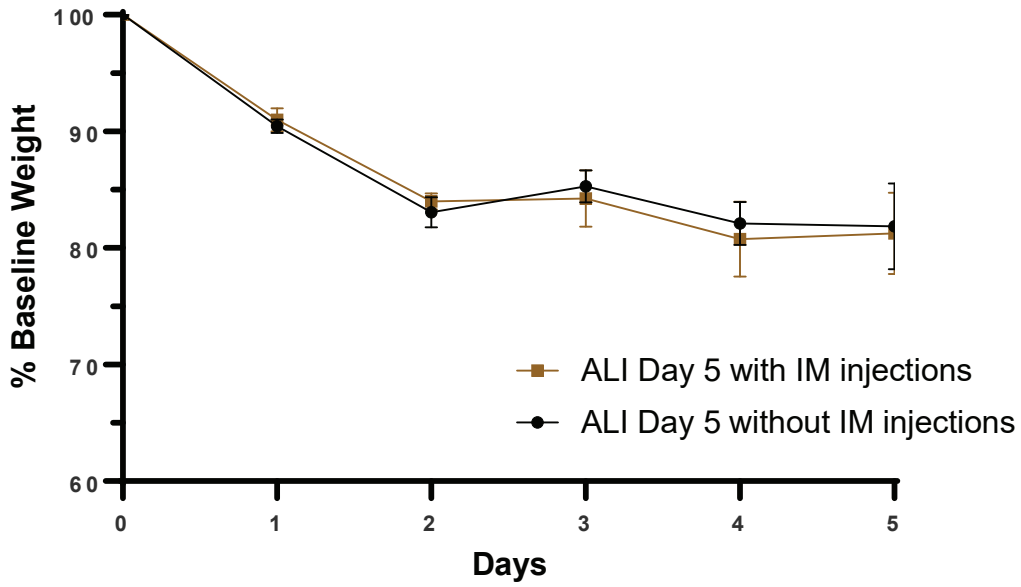

C

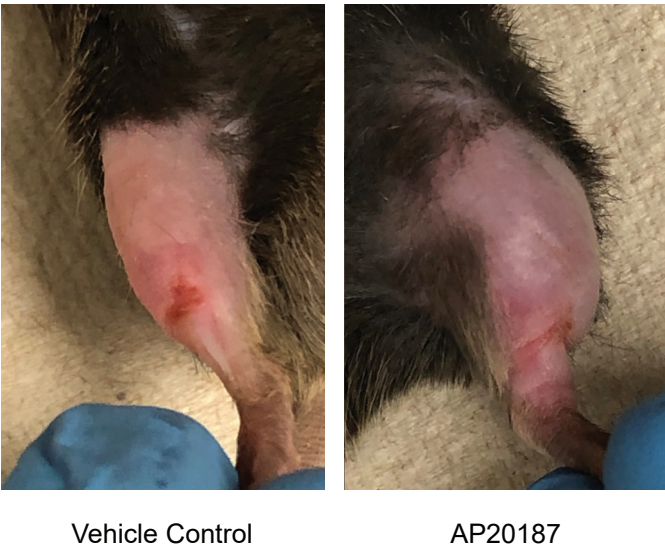

D

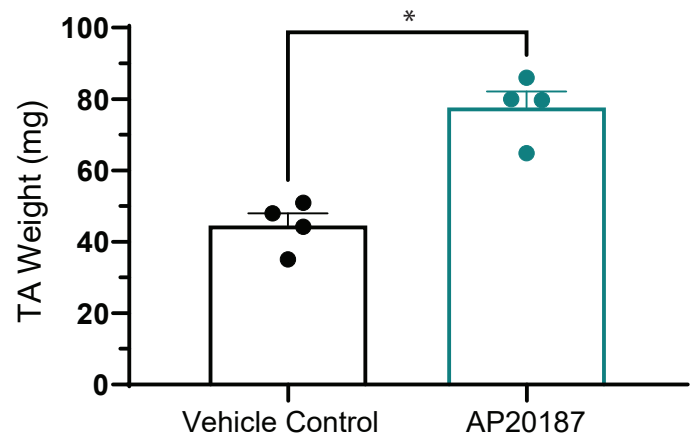

Supplement: NIHMS1853978-supplement-Supplemental_Figure_1.pdf [file NIHMS1853978-supplement-Supplemental_Figure_1.pdf]

Supplemental Fig. 2

A

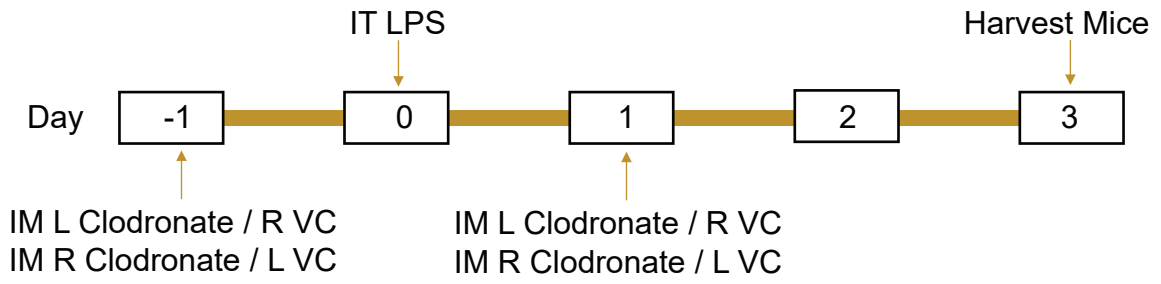

B

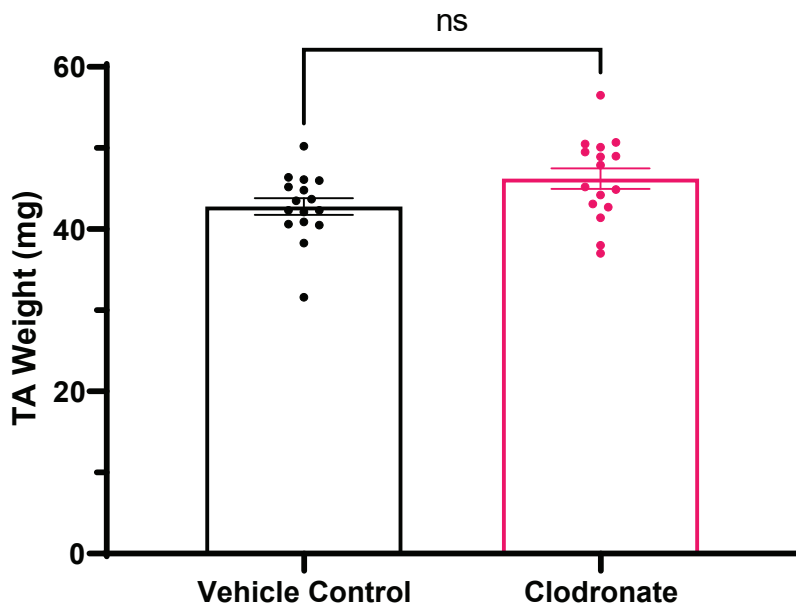

C

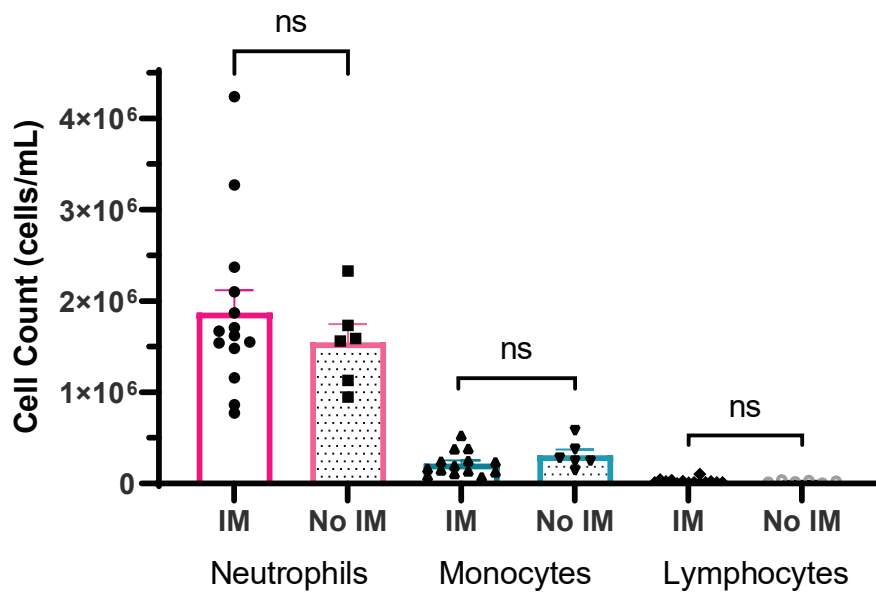

Supplement: NIHMS1853978-supplement-Supplemental_Figure_2.pdf [file NIHMS1853978-supplement-Supplemental_Figure_2.pdf]
